# Supplementary material for: Pharmacokinetic and excretion study of three alkaloids in rats using UPLC-MS/MS after oral administration of menispermi rhizoma capsules
Source: Royal Society of Chemistry journal article supplement (doi:10.1039/c8ra04084b), 2018-01-01
Supplement: c8ra04084b1.pdf [file c8ra04084b1.pdf]

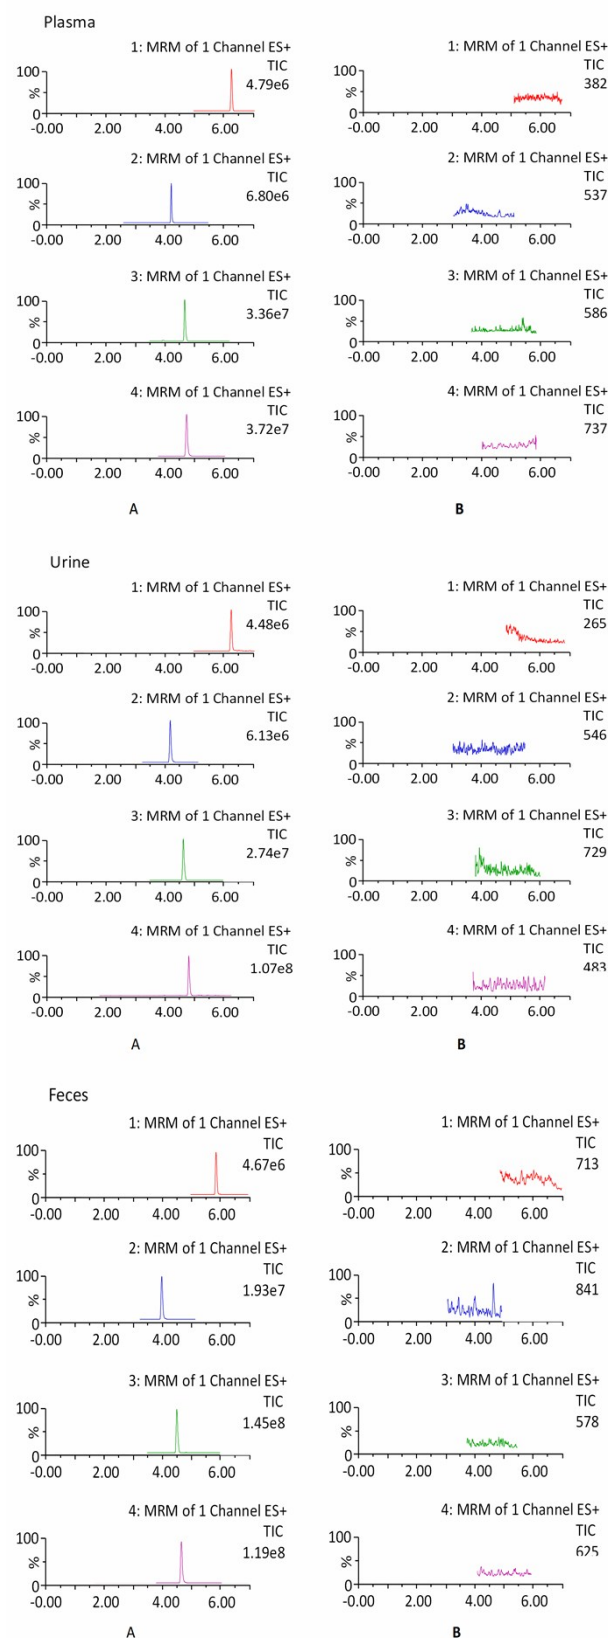

**Fig. S1 Carry over test of analytes and IS in plasma, urine, feces samples. (A) ULOQ samples for carbamazepine (IS) (channel 1), daucicoline (channel 2),**

**daurisolone (channel 3) and dauricine (channel 4) in plasma, urine and feces; (B)**  
**blank biological samples injected immediately following UPLQ**

**Table S1 Dilution test of daucicolone, daurisolone and dauricin in rat plasma, urine and feces.**

| Matrix<br>Compounds | Plasma  |        | Urine   |        | Feces   |        |
|---------------------|---------|--------|---------|--------|---------|--------|
|                     | RSD (%) | RE (%) | RSD (%) | RE (%) | RSD (%) | RE (%) |
| Daucicolone         | 4.6     | 4.2    | 7.2     | 5.2    | 6.5     | 4.1    |
| Daurisolone         | 5.8     | 5.2    | 3.9     | 4.4    | 4.7     | 4.9    |
| Dauricine           | 6.9     | 2.5    | 5.3     | 4.6    | 7.0     | 5.0    |
